# Supplementary material for: Biological Sex and Sex Hormone Impacts on Deficits in Episodic-Like Memory in a Rat Model of Early, Pre-motor Stages of Parkinson's Disease
Source: Front Neurol. 2020 Sep 17;11:942. doi: 10.3389/fneur.2020.00942 (PMC7527538; doi:10.3389/fneur.2020.00942)
Supplement: Supplementary file 1 [file Data_Sheet_1.XLSX]

## Sheet: Sheet1
Group	Animal_Number	Estrous_Lesion	Estrous_Test	BSM	WHAT	WHERE	WHEN	TT_TotalObjectExploration	TT_LatencytoObject	TT_Grooming	TT_Rearing	TT_LedgeInvestigation	TT_Stationary	TT_Ambulation	S1_Obj1	S1_Obj2	S1_Obj3	S1_Obj4	Avg_Time_S1_AllObjects	Duration_S1_Obj1	Duration_S1_Obj2	Duration_S1_Obj3	Duration_S1_Obj4	Duration_S1_Total	S1_TotalObjectExploration	S1_LatencytoObject	S1_Grooming	S1_Rearing	S1_LedgeInvestigation	S1_Stationary	S1_Ambulation	S2_Obj1	S2_Obj2	S2_Obj3	S2_Obj4	Avg_Time_S2_AllObjects	Duration_S2_Obj1	Duration_S2_Obj2	Duration_S2_Obj3	Duration_S2_Obj4	Duration_S2_Total	S1_TotalObjectExploration	S1_LatencytoObject	S1_Grooming	S1_Rearing	S1_LedgeInvestigation	S1_Stationary	S1_Ambulation	Lesion_RightHemisphere
F_SHAM	1	diestrus	estrus		0.51	0.22	0.41	30.75	0.9	11.6	25.88	110.82	33.38	62.4	2.13	5.47	8.8	11.4	6.95	0.43	0.91	1.47	1.04	0.99	27.8	0.42	3.73	0	164.27	18.63	74.4	2.46	4.5	9.76	16.71	8.36	1.23	0.9	0.89	1.39	1.11	33.43	0.58	6.75	4.67	189.5	17.61	59
F_SHAM	2	diestrus	estrus		0.41	0.54	0.04	27.05	0.68	21.61	6.57	84.88	52.59	71	4	7.73	6.93	14	8.17	0.44	1.1	0.87	1.08	0.88	32.67	1.1	0	0	157.5	28.87	87.5	8.38	13.85	9.97	9.67	10.47	1.2	1.26	0.77	1.21	1.07	41.87	1	9.77	4.46	141.31	33.19	70
F_SHAM	3	estrus	diestrus		0.44	0.05	0.41	30.06	2.25	11.15	0	17.18	126.56	72.2	10.93	8.93	7.33	21.6	12.2	0.99	0.69	1.05	1.54	1.08	48.8	1.7	13.4	0	26.55	98.92	89.2	11.09	6.14	13.68	11.91	10.71	0.92	0.68	0.91	1.08	0.91	42.83	2.6	0	0.52	52.53	85.97	102.2
F_SHAM	4	estrus	diestrus		0.17	-0.2	0.25	24.25	1.03	9.44	2.85	12.5	210.63	16.8	2	7.27	4.13	28.52	10.48	0.5	1.21	0.83	1.02	0.97	41.92	0.55	1.73	0	61.77	144.33	60	5.23	6.18	14.65	22.57	12.16	0.65	0.88	0.98	1.25	1.01	48.63	0.82	9.1	8.6	38.48	140.42	54.8
F_SHAM	5	proestrus	estrus		0.49	0.26	0.37	30.65	0.9	16.4	5.82	36.95	79.79	44.6	5.62	4.25	6.48	13.97	7.58	0.62	0.61	0.81	1.16	0.84	30.31	1.18	12.52	14.25	122.1	58.67	77	0.13	12.31	2.39	11.01	6.46	0.13	1.37	0.8	1.38	1.23	25.85	1.18	30.34	11.57	29.15	153.05	57.4
F_SHAM	6	estrus	diestrus		0.25	0.12	0.19	51.78	1.38	5.47	20.08	31.01	104.57	64.8	8.7	15.98	20.98	27.88	18.39	0.67	1.14	1.31	1.86	1.27	73.55	0.48	0	9.23	68.86	41.68	106.6	20.79	7.66	20.65	33.97	20.77	1.49	0.96	1.21	1.89	1.46	83.07	1.15	15.49	3.94	43.9	57.76	91
F_SHAM	7	diestrus	diestrus		0.65	0.29	0.54	15.3	1.9	12.52	0	46.53	182.17	31.8	1.62	8.07	8.08	20.15	9.48	0.54	1.01	0.9	1.01	0.95	37.93	0.65	32.34	0	39.8	109.72	78.4	6.32	5.82	8.26	13.72	8.53	0.9	0.83	1.03	0.81	0.87	34.12	1.78	19.85	0	36.25	123.79	72.2
F_SHAM	8	proestrus	proestrus		0.29	0.51	-0.06	53.05	1.23	9.59	4.45	76.09	110.52	43.2	15.25	12.59	5.43	11.74	11.25	2.18	1.8	0.91	0.84	1.32	45	0.83	0	5.17	77.44	79.52	105.8	6.16	8.03	15.11	8.42	9.43	1.54	1.15	1.26	0.77	1.11	37.72	0.38	0	6.85	117.25	67.96	56.2
F_SHAM	9	diestrus	diestrus		0.51	0.41	0.3	32.75	0.7	0	32.06	161.72	16.11	67.2	10.36	23.52	28.45	31.5	23.46	1.15	1.68	1.67	1.85	1.65	93.82	0.75	0	12.19	96.29	30.74	125.2	15.34	9.64	13.64	15.68	13.58	1.92	1.61	1.05	1.31	1.39	54.31	1.08	0	6.35	161.03	20.42	72
F_SHAM	10	diestrus	estrus		0.31	-0.13	0.37	43.52	19.3	24.65	1.63	68.33	89.59	56.4	10.16	7.89	4.35	32.24	13.66	1.13	0.53	0.54	1.24	0.94	54.64	3.05	15.4	0.77	24.55	94.34	125.2	7.91	21.95	29.58	1.6	15.26	0.99	2.74	1.23	0.4	1.39	61.04	4.84	8.67	0.78	65.44	91.73	59.4
F_SHAM	11	diestrus	estrus		0.37	-0.07	0.39	23.63	3.13	9.43	8.85	102.19	90.16	46	8.98	7.77	9.63	7.92	8.58	1.28	0.97	1.61	0.79	1.11	34.3	1.9	9.5	4.33	104.49	78.05	96	4.83	2.45	12.28	6.18	6.44	0.69	0.49	1.75	1.24	1.07	25.74	4.89	0	1.33	139.94	68.41	43
F_6-OHDA	1	proestrus	diestrus		0.02	0.06	-0.02	17.52	1.05	92.5	0	22.47	104.02	40.8	3.73	2.67	5	20.93	8.08	0.75	0.44	0.62	0.91	0.77	32.33	0.62	24.45	1.33	69.4	90.37	74.8	19.7	5.25	12.83	21.83	14.9	1.23	0.75	1.07	2.18	1.32	59.61	0.75	36.44	0.27	33.24	110.68	50.2	12.72
F_6-OHDA	2	diestrus	diestrus		-0.2	-0.06	-0.17	23.14	1.95	2.3	11.02	103.53	62.24	61.2	7.6	11.2	7.73	28	13.63	1.09	0.75	0.64	1.08	0.91	54.54	0.49	0	10.21	98.93	42.17	83.6	5.14	9.84	10.93	16.73	10.66	0.64	0.98	0.91	0.98	0.91	42.65	6.23	0	14.13	105.13	55.89	69.6	9.5
F_6-OHDA	3	diestrus	estrus		-0.06	0.12	-0.13	43.54	5.28	8.04	1.25	83.9	89.76	57.6	9.73	15.34	10.4	5.87	10.33	0.44	0.64	0.58	0.45	0.54	41.33	0.7	3.57	0	61.23	100.58	83.8	2.72	6.99	12.61	8.67	7.75	0.45	0.64	1.58	0.87	0.89	30.99	7.42	9.72	0	64.06	114.21	74.2	8.29
F_6-OHDA	4	proestrus	proestrus		0.04	-0.28	0.16	31.76	2.13	19.24	2.02	118.23	73.3	46.2	4.67	10.67	12.53	8.4	9.07	0.52	0.71	1.04	0.76	0.77	36.26	1	8.08	0.77	83.83	66.91	86.6	15.33	14.44	10.27	4.74	11.2	1.28	2.41	1.03	0.79	1.32	44.78	0.9	13.28	5.5	54.41	84.09	66	26.11
F_6-OHDA	5	diestrus	estrus		0.13	0.07	0.09	47.95	3.81	7.85	5.86	118.31	69.56	46	5.95	18.09	12.45	8.82	11.33	2.98	1.39	1.56	1.1	1.46	45.3	9.4	26.56	1.78	58.18	108.76	70.8	1.68	17.91	19.42	13.22	13.06	0.56	2.24	1.77	1.1	1.54	52.22	4.32	11.15	2.35	105.33	75.92	54	29.48
F_6-OHDA	6	diestrus	proestrus		-0.01	-0.03	0.01	38.45	1.95	17.09	1.07	80.27	91.14	63.2	26.69	9.42	6.19	35.59	19.47	1.4	0.63	1.24	1.27	1.16	77.88	2.35	7.53	0	44.62	77.67	119.4	15.18	13.49	19.43	13.3	15.35	1.27	0.96	1.14	1.11	1.12	61.4	0.27	17.49	2.35	64.72	81.46	85.2	19.98
F_6-OHDA	7	diestrus	diestrus		-0.06	-0.42	0.12	62.68	2.4	18.26	8.97	31.56	118.73	55.4	5.41	23.72	34.05	5.45	17.16	0.68	1.25	1.22	0.61	1.07	68.63	3.75	21.62	2.35	21.75	110.07	52.8	22.71	25.95	13	2.39	16.01	1.75	1.24	1.3	1.2	1.39	64.06	4.32	17.35	0	23.73	176.12	37	10.83
F_6-OHDA	8	estrus	estrus		0.1	-0.3	0.23	33.58	1.13	0.79	6.42	93.91	110.32	38.4	46.37	15.2	18.23	13.52	23.33	3.09	0.89	1.3	1.35	1.67	93.32	0.65	7.57	0	60.52	78.48	66.8	4.73	11.53	4.9	17.08	9.56	1.58	1.28	1.23	0.9	1.09	38.24	0.8	19.76	2.26	45.95	151.4	40.4	22.12
F_6-OHDA	9	estrus	diestrus		-0.3	0.07	-0.33	23.57	7.7	19.68	1.75	27.57	197.9	27.6	18.16	17.95	13.81	4.91	13.71	1.14	0.78	0.66	0.61	0.81	54.83	1.23	21.61	1.98	47.52	101.1	63	15.29	19.09	2.14	2.85	9.84	0.8	0.91	0.36	0.95	0.8	39.38	5.25	22.01	5.33	42.65	133.11	40.4	17.99
F_6-OHDA	10	estrus	proestrus		0	-0.28	0.13	9.98	17.59	19.3	0	38.68	179.91	39.8	8.64	20.92	8.89	23.02	15.37	1.23	1.23	1.27	1.77	1.4	61.47	0.87	10.75	0	40.87	119.93	63	10.36	3.82	1.3	13.61	7.27	0.94	0.64	0.65	0.91	0.86	29.09	0.38	19	2.05	77.85	105.43	63.2	9.88
M_SHAM	1				0.02	0.29	-0.15	11.8	11.15	0	1.03	26.3	196.8	32.8	4.67	10.67	5.13	9.47	7.48	0.93	1.19	0.86	0.95	1	29.93	2.75	19.87	0	14.38	172.66	51.2	6.02	0.25	14.56	8.35	7.3	1	0.25	0.81	1.67	0.97	29.18	4.27	0	0	34.07	172.89	50.8
M_SHAM	2				0.67	0.74	-0.01	55.37	4.78	11.44	1.33	30.87	130.69	28.4	3.53	14.6	15.47	5.27	9.72	1.18	0.91	1.72	1.32	1.21	38.86	5.43	7.08	0	25.79	173.86	42.6	17.43	11.22	6.74	32.14	16.88	0.97	1.4	0.67	1.79	1.25	67.53	1.62	3.35	2.13	49.15	82.77	60
M_SHAM	3				0.41	0.21	0.31	26.98	2.53	6.53	0.28	23.51	178.91	40.6	8.73	17.53	20.73	17.6	16.15	0.79	0.92	1.38	1.04	1.04	64.6	1.15	12.9	0	55.29	71.34	83.2	2.85	7.85	8.42	15.37	8.62	0.95	1.96	1.4	1.1	1.28	34.5	3.58	30.65	0	2.88	168.32	39.4
M_SHAM	4				0.15	0.33	-0.05	19.17	9.72	0	4.3	96.32	109.94	49	15.61	11.23	8.38	3.63	9.71	2.23	2.81	1.4	1.21	1.94	38.84	0.32	0	0.73	70.14	127.57	66	10.8	11.44	9.47	5	9.18	0.72	1.27	1.18	1	0.99	36.7	5.03	3.97	3.25	64.63	125.85	67.4
M_SHAM	5			1.65	0.15	0.39	-0.1	20.95	2.83	0	2.9	156.42	50.72	44.2	7	7.4	3.13	12.8	7.58	0.47	0.57	0.52	0.75	0.59	30.33	1.67	3.7	4.24	71.78	102.88	63.4	2.65	4.23	8.17	1.33	4.09	0.44	0.6	1.17	1.33	0.78	16.38	2.13	0	1.55	84.9	139.95	54.6
M_SHAM	6			1.78	0.3	0.25	0.16	29.5	4.3	13.09	0	155.81	25.68	60	11.13	7.13	7.73	10.07	9.02	1.24	0.79	0.97	0.84	0.95	36.07	0.9	6.45	0	144.22	23.84	112	6.82	5.84	6.01	3.07	5.44	0.97	0.97	1.2	0.77	0.99	21.75	2.65	6.9	0.53	190.86	11.62	74.6
M_SHAM	7			1.87	0.55	0.18	0.47	48.2	0.68	16.89	0.53	5.45	185.3	23	2.2	16.8	17	7.8	10.95	0.73	1.2	1.06	1.11	1.1	43.8	1.02	23.48	0	16.23	181.33	42	6.62	9.62	13.21	1.25	7.67	0.51	1.6	0.88	0.62	0.85	30.7	2.08	19.25	1.6	61.5	138.07	39
M_SHAM	8			1.73	0.07	0.17	-0.02	22.62	1.23	15.24	10.97	54.21	122.23	35.8	18.4	12.2	5.6	3.8	10	1.31	1.02	0.93	0.76	1.08	40	3.32	12.83	0	14.78	158.32	43.6	5.86	1.82	4.2	5.48	4.34	0.49	0.36	0.6	1.37	0.62	17.36	0.95	19.7	0	36.4	170.57	33.6
M_SHAM	9			1.62	0.12	-0.15	0.19	42.4	3.1	0	14.27	77.56	115.45	34.6	9.73	8.6	4.33	13	8.92	0.75	0.51	0.62	1.62	0.79	35.67	1.52	0	23.22	132.6	29.44	74.6	3.68	5.13	10.31	5.12	6.06	0.61	1.03	0.64	0.73	0.71	24.23	2.63	1.6	19	121.77	54.84	49.8
M_SHAM	10			1.5	0.37	0.23	0.25	35.4	0.73	8.08	1.55	53.3	122.82	42.2	5.09	8.17	5.38	14.54	8.29	0.46	0.68	1.08	1.32	0.85	33.17	0.24	13.3	0	52.25	113.07	81.6	33.41	0	2.6	4.75	10.19	1.52	0	0.87	2.37	1.51	40.76	0.58	62.98	0	15.78	186.57	18.2
M_SHAM	11			1.51	0.8	0.7	0.46	30.32	5.93	17.15	0	8.91	178.53	55.4	8.28	11.34	8.92	9.4	9.49	0.83	0.71	1.27	1.57	0.97	37.95	0.52	16.53	0	19.97	169.41	55	8.72	1.9	9.54	2.35	5.63	1.45	0.95	1.36	1.17	1.32	22.51	1.7	57.43	2.75	8.78	158.38	40.2
M_6-OHDA	1				-0.2	-0.04	-0.18	34.26	1.19	19.32	0.5	50.22	130.45	38	14.73	15.42	12.29	14.51	14.24	1.05	0.91	1.54	1.61	1.19	56.96	1.1	8.39	0.5	32.06	126.92	61.6	10.8	14.75	19.63	8.48	13.42	1.2	1.23	1.51	0.94	1.25	53.66	0.92	0	3.68	20.45	154.37	75.2	27.23
M_6-OHDA	2				0.08	0.06	0.05	69.58	1.27	0	24.12	22.28	150.76	31.6	10.82	19.1	16.92	16.12	15.74	0.6	1.01	1.13	1.01	0.93	62.97	0.68	9.66	0	15.72	122.23	66.6	14.18	12.71	6.42	40.06	18.34	1.01	0.85	0.64	1.82	1.2	73.37	1.1	6.3	1.05	30.76	108.23	33.8	23.75
M_6-OHDA	3				0.05	0.18	-0.05	40.75	1.05	0	60.4	15.3	109.23	37.2	5.93	18.4	12.03	32.74	17.28	0.74	1.02	0.75	1.49	1.08	69.1	1.63	20.81	2.37	22.76	81.66	65.6	1.07	3.96	14.71	10.25	7.5	0.54	0.57	0.92	0.68	0.75	29.98	4.45	7.9	21.49	48.77	92.24	60	27.71
M_6-OHDA	4				0.26	0.34	0.05	31.63	15.6	31.39	0	83.58	74.39	45.2	15.07	14.93	14.4	14.27	14.67	1.26	1.07	1.44	1.43	1.28	58.67	0.87	7.55	0.53	101.94	36.42	95.4	3.67	9.22	3.16	13.16	7.3	1.22	1.54	0.79	1.01	1.12	29.22	2.63	15.25	0	79.98	106.47	60.8	18.13
M_6-OHDA	5			1.64	-0.32	0.15	-0.39	25.17	1.17	4.45	25.25	71.41	114.16	32	9.33	6.93	5.06	33.73	13.77	0.78	0.5	0.63	1.82	0.79	55.07	0.17	15.4	8.64	52.49	87.57	104.6	4.53	1.03	13.22	17.16	8.98	0.65	0.51	0.63	1.01	0.76	35.94	3.35	0	23.9	48.47	125.07	38.2	14.45
M_6-OHDA	6			1.54	0	0.24	-0.14	32.1	0.87	1.85	28.77	102.76	48.17	66.4	4	14.8	10.93	10.27	10	0.67	0.87	0.73	0.86	0.8	40	0.62	16.32	0	46.83	107.19	74.6	6.75	5.52	2.69	6.77	5.43	0.84	0.79	0.34	0.97	0.72	21.73	5.62	0	1.57	63.49	114.17	70.8	8.64
M_6-OHDA	7			1.58	-0.23	0.11	-0.29	27.18	1.28	0	2.6	78.03	105.95	39.8	6.73	3.8	1.87	27.73	10.03	0.96	0.48	0.31	0.84	0.74	40.13	1.08	34.17	1.8	25.33	119.91	64	3.91	1.32	11.48	13.5	7.55	0.98	0.44	0.6	1.93	0.92	30.21	1.23	0	7.91	51.18	133.1	53.4	10.23
M_6-OHDA	8			1.53	-0.12	-0.36	0.03	35.01	0.83	18.48	3.72	47.44	123.16	31.6	6.21	20.37	11.62	13.19	12.85	0.69	0.97	1.16	1.2	1.01	51.38	2.89	20.05	0.53	33.38	147.16	73.6	7.15	1.55	13.35	5.86	6.98	1.02	0.39	0.7	0.65	0.72	27.91	0.73	23.39	3.92	46.52	119.1	55.4	7.3
M_6-OHDA	9			1.94	-0.08	-0.29	0.05	7.96	21.53	11.69	4.57	139.6	112.29	16.6	5.27	2.27	5.07	5.34	4.48	0.53	0.28	0.63	0.49	0.48	17.94	0.39	0	0	126.51	93.47	51	0.67	1.57	0	2.9	1.28	0.33	0.52	0	0.97	0.64	5.14	4.05	0	0	259.42	12.94	16	29.95
M_6-OHDA	10			1.62	-0.08	0.08	-0.12	41.17	2.08	14	8.9	7.63	145.84	36.4	15.4	15.8	24.2	9.33	16.18	0.91	0.63	0.93	1.04	0.84	64.73	0.69	0	8.4	54.77	92.19	73.87	20.42	6.25	18.43	4.98	12.52	1.46	0.78	1.15	1.25	1.19	50.08	1.81	0	1.85	14.13	176.27	42	26.35
M_6-OHDA	11			1.61	-0.19	-0.08	-0.15	30.62	1.25	7.94	0	60.16	121.17	36.8	23.2	11.74	3.2	4.13	10.57	1.1	0.59	0.8	1.03	0.86	42.27	1.6	14.1	0	36.41	128.62	52.8	13.28	2.9	13.58	0.15	7.47	1.21	0.58	2.72	0.15	1.36	29.9	3.37	7.83	2.94	69.25	125.69	31.4	14.82
GDX-OH	1			0.63	0.23	0.69	-0.34	24.19	1.35	1.85	0	170.25	38.04	70.8	9.13	9.57	3.78	18.45	10.23	1.3	0.74	0.47	1.02	0.89	40.92	3.71	13.37	0	113.7	27.56	95.6	4.23	6.34	7.05	14.03	7.91	0.6	1.06	1.01	1.17	0.99	31.65	0.43	1.91	0	143.86	38.69	78.4	21.3
GDX-OH	2			0.53	0.4	0.43	0.14	63.1	13.34	1.02	8.27	27.68	173.36	26.4	18.49	10.4	3.97	15.42	12.07	1.16	1.04	0.79	1.19	1.1	48.28	0.32	0.25	0	10.27	115.95	51.4	18.45	5.45	10.83	5.17	9.97	1.09	1.36	0.77	1.29	1.02	39.9	0.58	0	3.12	25.24	175.12	39	52.38
GDX-OH	3			0.4	0.37	0.94	-0.76	12.55	1.13	2.95	0	8.43	242.79	20.6	24.23	10.44	14.59	20.56	17.45	1.1	0.7	1.22	1.03	1.01	69.81	2.7	12.35	3.07	34.57	100.22	94.8	1.28	12.93	5.9	5.13	6.31	0.64	0.86	0.98	0.73	0.84	25.23	0.52	0	0	25.74	177	54.4	17.09
GDX-OH	4			0.59	0.19	-0.23	0.28	36.47	1.37	0	2.35	38.34	163.86	45.6	9.95	8.95	11.98	29.9	15.2	0.9	1.12	1.5	1.99	1.45	60.78	0.68	0	0	75.29	54.64	88.6	7.58	1.83	21	10.2	10.15	0.95	0.61	1.05	1.28	1.04	40.61	2.71	0	1.32	156.5	54.75	46.4	19.25
GDX-OH	5			0.68	0.32	0.13	0.26	52.18	0.91	0	5.5	159.48	31.26	116	27.53	18	16.32	20.05	20.47	1.45	1	1.36	1.11	1.22	81.9	0.1	26.25	1.85	67.19	22.44	115.2	5.56	5.53	11.71	14.74	9.38	0.79	1.84	1.3	1.47	1.29	37.53	1.25	0	1.02	161.21	29.52	67.8	7.13
GDX-OH	6			0.55	0.02	-0.19	0.1	25	0.59	24.29	2.12	55.24	144.03	39	15.58	7.4	16.08	14.33	13.35	1.04	0.67	1.24	1.19	1.05	53.38	0.58	9.16	1.67	42.96	112.84	86	6.85	2.08	9.91	7.15	6.5	0.98	0.52	0.99	0.65	0.81	25.99	1.15	0.09	0	105.64	78.47	59.6	12.06
GDX-OH	7			0.54	0.22	0.17	0.13	67.41	2.15	1.52	20.92	84.77	70.54	51.4	2.55	15.97	6.45	4.12	7.27	0.64	0.94	1.08	0.69	0.88	29.1	2.98	20.95	0	18.89	170.82	29.6	12.55	5.99	11.02	24.72	13.57	1.14	1	1	1.24	1.13	54.29	2.13	42.12	0	22.1	136.12	37.6	11.65
GDX-OH	8			0.53	-0.02	0.7	-0.55	42.07	0.87	3.65	0.24	66.07	108.5	56.4	18.34	15.67	5.2	34	18.3	1.31	0.78	0.65	1.31	1.08	73.2	0.65	24.13	2.07	22.35	59.86	82.6	4.95	0.8	6.82	16.5	7.27	1.65	0.8	0.85	0.83	0.91	29.07	0.8	13.38	4.46	1.02	187.76	45.2	21.18
GDX-OH	9			0.53	-0.17	0.04	-0.2	10.89	1.02	10.77	4.4	129.53	67.76	25.4	9.47	7.2	4.4	8	7.27	0.68	0.72	0.73	0.57	0.66	29.07	0.83	10.56	3.2	91.14	96.61	65.6	3.93	0.53	3.65	9.2	4.33	0.39	0.53	0.46	3.07	0.79	17.31	2.04	7.9	0	189.49	33.25	31.2	17.36
GDX-OH	10			0.43	0.04	0.43	-0.24	26.15	9.35	15.45	0	81.41	75.84	57.4	9.07	7.73	1.47	20	9.57	1.13	0.86	0.73	1.25	1.09	38.27	12.53	0	0.52	17.15	166.32	44.6	7.08	4.45	9.91	14.2	8.91	0.64	1.11	1.24	2.03	1.19	35.64	14.68	0	1.05	56.32	133.52	43.2	20.51
TP-OH	1			0.86	-0.04	-0.03	-0.03	24.44	1.04	0	32.7	135.86	25.85	61.8	15.93	11.8	11.4	31.67	17.7	1.33	0.84	1.14	1.13	1.11	70.8	0.42	3.02	5.22	59.61	33.14	113.4	7.4	7.6	10.53	14	9.88	0.62	1.27	0.81	0.82	0.82	39.53	0.68	0	16.64	143.9	18.84	91.8	24.09
TP-OH	2			0.76	0.06	0.22	-0.07	19.35	3.8	17.53	1.05	19.9	202.32	23.4	14.13	12.27	4.6	11.47	10.62	1.41	0.94	0.58	0.88	0.97	42.47	2.45	25.53	0	7.56	172.91	53	7.71	5.17	13.15	7.81	8.46	0.86	1.04	0.69	0.87	0.81	33.84	1.78	7.63	0.75	30.58	160.16	53.6	33.6
TP-OH	3			0.96	-0.28	0.09	-0.32	26.96	10.55	17.86	7.48	61.25	129.63	37.2	11.2	12.2	10.2	17.33	12.73	1.12	0.81	2.04	0.72	0.94	50.93	2.08	0	0	48.88	127.99	55.6	6.37	4.42	19.52	13.01	10.83	0.91	0.88	1.08	0.77	0.92	43.32	2.06	0	12.68	84.95	70.02	56.4	8.58
TP-OH	4			0.73	0.12	-0.14	0.18	31.6	2.75	13.92	44.17	74.91	62.77	42.2	4.67	9.27	10	22.73	11.67	0.67	0.62	1	1.14	0.9	46.67	4.6	9.2	17.2	81.49	64.62	80.6	2.39	9.78	19.68	8.98	10.2	0.6	0.89	1.51	0.9	1.07	40.82	0.97	15.09	33.36	83.72	65.56	39.8	12.59
TP-OH	5			0.98	-0.01	-0.03	0.01	58.78	4.43	26.8	4.81	117.69	61.36	45.4	12.93	38.6	9.4	6	16.73	1.29	1.93	1.04	1	1.49	66.93	4.92	28.67	0	49.55	119.23	69.8	11.87	8.4	16.67	6.57	10.88	1.08	2.1	1.28	1.1	1.28	43.52	5.37	33.79	0	86.52	71.78	53.2	22.75
TP-OH	6			1.73	0.05	-0.25	0.16	27.58	3.8	0	1.99	50.78	158.22	45.2	16	22.67	7.87	23.6	17.53	1	0.99	0.87	1.39	1.08	70.14	0.55	0	6.99	14.63	114.16	102.2	1.08	2.58	10	14.32	6.99	0.36	0.64	0.83	1.59	1	27.97	0.88	0	0	18.46	202.18	24.2	15.2
TP-OH	7			1.04	-0.07	0.15	-0.15	24.85	2.07	27.1	0	14.23	189.16	32.8	1.6	1.07	8.13	0.53	2.83	0.53	0.53	1.16	0.53	0.87	11.33	3.6	0	0	116.98	167.38	15.8	14.45	5.97	5.59	2.65	7.16	1.44	1.49	0.7	0.88	1.15	28.65	1.3	0	0	111.59	94.82	43.8	30.11
TP-OH	8			0.98	-0.11	0.12	-0.17	19.49	2.14	20.05	0	150.65	54.55	44.8	3.4	10.87	9.47	5.2	7.23	0.38	0.72	0.95	1.04	0.74	28.93	2.77	20.63	0	29.48	169.37	53.2	9.92	8.05	9.33	1.59	7.22	0.83	1.01	1.17	0.4	0.9	28.89	2.48	19.51	3.22	97.93	94.58	43.6	16.24
TP-OH	9			0.82	-0.39	0.1	-0.44	9.18	6.35	0	0	136.58	124.12	25.4	3.15	0.8	2.36	5.67	2.99	1.57	0.8	1.18	0.81	1	11.97	0.27	21.95	0	41.98	187.75	59.8	1.55	4.42	1.03	11.65	4.66	1.55	1.47	0.34	2.33	1.55	18.64	4.13	59.36	0	23.52	178.28	16.4	33.59
TP-OH	10			0.84	0.03	0.22	-0.1	23.33	1.33	44.12	0.55	54.98	67	45.4	27.69	8.65	4.37	7	11.93	1.46	0.62	1.09	0.88	1.06	47.71	1.93	11.15	0	36.65	138.63	50.4	19.6	5.92	0.72	3.09	7.34	0.89	0.85	0.24	1.03	0.84	29.34	0	39.88	0	25.77	160.18	34.2	9.45
TP-OH	11			0.87	0.02	-0.28	0.15	23.27	4.33	12.05	0	25.33	181.73	16.8	4.77	26.6	6.27	1.07	9.68	1.19	1.4	1.04	1.07	1.29	38.71	0.85	8.24	0	41.18	181.84	39.8	4.59	42.76	3.03	2.35	13.18	1.15	2.14	1.01	1.18	1.82	52.74	4.14	9.4	0	9.14	208.63	39.6	17.61
E-OH	1			0.49	-0.1	0.23	-0.23	24.06	2.68	27.05	0.53	81.21	108.88	35	10.2	13.53	17.33	19.6	15.17	1.02	1.04	1.58	1.31	1.24	60.67	1.35	0	0	43.82	115.14	58.6	4.33	20.68	1.28	10.03	9.08	0.72	2.3	0.43	1.43	1.45	36.31	2.12	21.82	0	134.95	58.3	37.4	9.95
E-OH	2			0.6	0.03	-0.18	0.11	43.98	1.48	0	22.39	125.71	28.65	51.2	21.07	6.87	11.27	22.67	15.47	1.5	0.86	1.41	1.08	1.21	61.87	1.3	1.74	15.28	86.84	63.64	55.4	4.74	5.05	17.13	9.52	9.11	1.58	1.26	1.01	0.95	1.07	36.44	0.85	0	5.8	148.2	28.33	71.8	44.43
E-OH	3			0.56	0.19	0.34	-0.01	22.56	12.33	5.9	19.41	156.5	49.61	50.6	10.8	10.27	4.8	16.13	10.5	0.68	0.79	0.96	0.95	0.82	42	2.78	14.43	12.25	133.47	23.25	108.2	8.7	2.92	12.84	16.87	10.33	1.24	0.97	0.86	0.94	0.96	41.32	0.7	0	11.93	187.58	7.54	68.8	20.69
E-OH	4			0.59	0.44	0.59	0.03	17.89	2.18	22	0	20.2	189.34	19.4	10.4	10.07	13.07	9.73	10.82	2.08	0.67	0.93	0.81	0.94	43.27	3.61	13.58	0	19.09	185.31	37.4	2.69	2.4	8.37	16.24	7.43	0.45	0.4	0.7	1.02	0.74	29.7	2.67	0	0	29.25	172.24	33.2	6.2
E-OH	5			0.63	0.01	0.54	-0.36	17.24	2.33	11.8	2.35	74.92	107.45	65.4	6.27	6.26	11.33	12.4	9.07	0.78	0.78	0.94	1.13	0.93	36.27	0.65	9.32	0.27	45.35	126.82	104.4	4.58	7.06	0.28	7.11	4.76	0.76	0.88	0.14	0.79	0.76	19.03	3.03	20.98	0	45.08	125.41	54.8	16.45
E-OH	6			0.53	0.11	0.5	-0.23	25.78	2.88	0	15.21	114.25	63.06	67.2	14.27	17.73	10.87	16.6	14.87	1.3	1.11	1.36	1.11	1.19	59.46	2.57	1.8	2.77	108.2	47.9	138.4	2.12	1.06	9.04	10.31	5.63	0.53	0.35	1	1.47	0.98	22.53	1.6	0	3.91	128.4	66.46	63	8.01
E-OH	7			0.66	0.2	-0.04	0.22	29	0.67	40.34	0	78.03	91.71	52.8	8.93	14.4	11.87	4.4	9.9	0.99	0.72	0.74	0.73	0.78	39.6	2.6	13.09	0	71.22	81.23	109	3.45	1.83	2.53	10.48	4.57	1.72	0.61	0.36	0.95	0.79	18.28	0.78	21.7	0	103.4	60.67	65.4	22.45
E-OH	8			0.33	0.4	0.24	0.28	37.43	0.97	15.94	4.45	52.17	136.13	50.2	3.13	23.4	11.67	5.72	10.98	0.63	1.02	0.83	0.64	0.86	43.92	2.1	18.15	0	33.05	134.18	47.2	7.35	10.28	8.76	8.52	8.73	0.67	0.93	0.63	0.85	0.76	34.92	2.4	17.3	2.92	43.39	128.71	46.8	28.76
E-OH	9			0.45	-0.1	0.13	-0.16	19.69	3.33	12.3	0	20.71	150.27	31.6	6.33	30.13	7.61	1.32	11.35	0.7	1.21	0.69	0.44	0.95	45.38	0.43	25.37	0	20.19	167.39	52.2	2.38	29.3	2.65	5.93	10.07	0.48	1.17	0.88	0.74	0.98	40.27	3.78	38.31	0	25.65	119.71	38.2	27.03
E-OH	10			0.45	0.08	0.52	-0.28	42.88	4.68	16.84	9.88	39.07	115.78	55.4	27.54	15.67	7.6	8.36	14.79	1.31	0.87	0.84	0.56	0.94	59.16	0.5	12.1	5.05	49.25	75.74	77	18.95	10.29	10.4	23.18	15.71	1	2.06	1.73	1.22	1.28	62.83	0.59	16.43	9.47	57.49	70.15	86.6	27.53
E-OH	11			0.37	0.19	0.24	0.06	34.04	0.93	8.04	3.41	43.7	149.09	55.4	8.66	24.11	11.28	16.47	15.13	0.67	0.96	0.71	1.27	0.9	60.52	1.28	7.08	0	28.94	106.64	69	5.57	7.09	12	8.09	8.19	1.11	0.79	0.71	1.16	0.86	32.75	1.1	5.57	1	18.92	168.49	58	10.27
[truncated: 4 more columns]
